# Supplementary material for: Development of a novel (poly)phenol-rich diet score and its association with urinary (poly)phenol metabolites
Source: Royal Society of Chemistry journal article supplement (doi:10.1039/d3fo01982a), 2023-01-01
Supplement: d3fo01982a1.pdf [file d3fo01982a1.pdf]

## Development of a (poly)phenol-rich diet score and its association with urinary (poly)phenol metabolites

Yifan Xu <sup>1#</sup>, Yong Li <sup>1#</sup>, Jiaying Hu <sup>1</sup>, Rachel Gibson <sup>1</sup>, Ana Rodriguez-Mateos <sup>1\*</sup>

<sup>1</sup> Department of Nutritional Sciences, School of Life Course and Population Sciences, Faculty of Life Sciences and Medicine, King's College London, London, UK

\* Author to whom correspondence should be addressed.

# Co-first authors contributed equally to this work

### Supplementary materials

**Table S1 Micro and Macronutrient intake of the study population measured by Food Frequency Questionnaires (n=543)**

| <b>Micro and Macronutrient</b>       | <b>Mean</b> | <b>SD</b> |
|--------------------------------------|-------------|-----------|
| Fibre (g/d)                          | 16.1        | 7         |
| Calcium (mg/d)                       | 804         | 308.4     |
| Chloride (mg/d)                      | 3334.3      | 1257.8    |
| Copper (mg/d)                        | 1.2         | 0.4       |
| Iron (mg/d)                          | 10.3        | 3.5       |
| Iodine (µg/d)                        | 130.4       | 57        |
| Potassium (mg/d)                     | 3161.2      | 984.7     |
| Selenium (µg/d)                      | 59.2        | 25.1      |
| Nitrogen (g/d)                       | 12.2        | 4.2       |
| Zinc (mg/d)                          | 8.6         | 2.9       |
| Magnesium (mg/d)                     | 299.4       | 99        |
| Manganese (mg/d)                     | 3.3         | 1.4       |
| Sodium (mg/d)                        | 2229.8      | 850.3     |
| Niacin (mg/d)                        | 20.6        | 7.4       |
| Phosphorus (mg/d)                    | 1272.8      | 389.2     |
| Vitamin A_retinol (µg/d)             | 415.7       | 423.9     |
| Vitamin A_retinol equivalents (µg/d) | 1055.3      | 593.3     |
| Alpha carotene (µg/d)                | 437.5       | 387.6     |
| Beta carotene (µg/d)                 | 3428.5      | 2206.4    |
| Total carotene (µg/d)                | 3809.6      | 2398.8    |
| Vitamin B1 (mg/d)                    | 1.4         | 0.5       |
| Vitamin B2 (mg/d)                    | 1.7         | 0.6       |
| Vitamin B6 (mg/d)                    | 2           | 0.7       |
| Vitamin B12 (µg/d)                   | 6           | 3.9       |
| Vitamin C (mg/d)                     | 106.4       | 57.2      |
| Vitamin D (µg/d)                     | 3           | 2.5       |
| Vitamin E (mg/d)                     | 10.7        | 4.5       |
| Total folate (µg/d)                  | 270.2       | 102.4     |
| Fat (g/d)                            | 64.9        | 24.9      |
| Cholesterol (mg/d)                   | 267.7       | 150.5     |
| MUFA (g/d)                           | 24.9        | 10.4      |
| PUFA (g/d)                           | 11.9        | 5.2       |
| SFA (g/d)                            | 22.4        | 9.8       |
| Protein (g/d)                        | 75.5        | 25.9      |
| Total carbohydrate (g/d)             | 184.2       | 61.3      |
| Sugars (g/d)                         | 87.8        | 36.4      |
| Fructose (g/d)                       | 18.8        | 10.1      |
| Galactose (g/d)                      | 0.6         | 0.7       |
| Glucose (g/d)                        | 16.9        | 8.5       |
| Starch (g/d)                         | 93.3        | 37.2      |
| Sucrose (g/d)                        | 34.5        | 17.4      |
| Lactose (g/d)                        | 13.2        | 9.4       |
| Maltose (g/d)                        | 1.9         | 1.4       |

## Workflow of PPS component selection

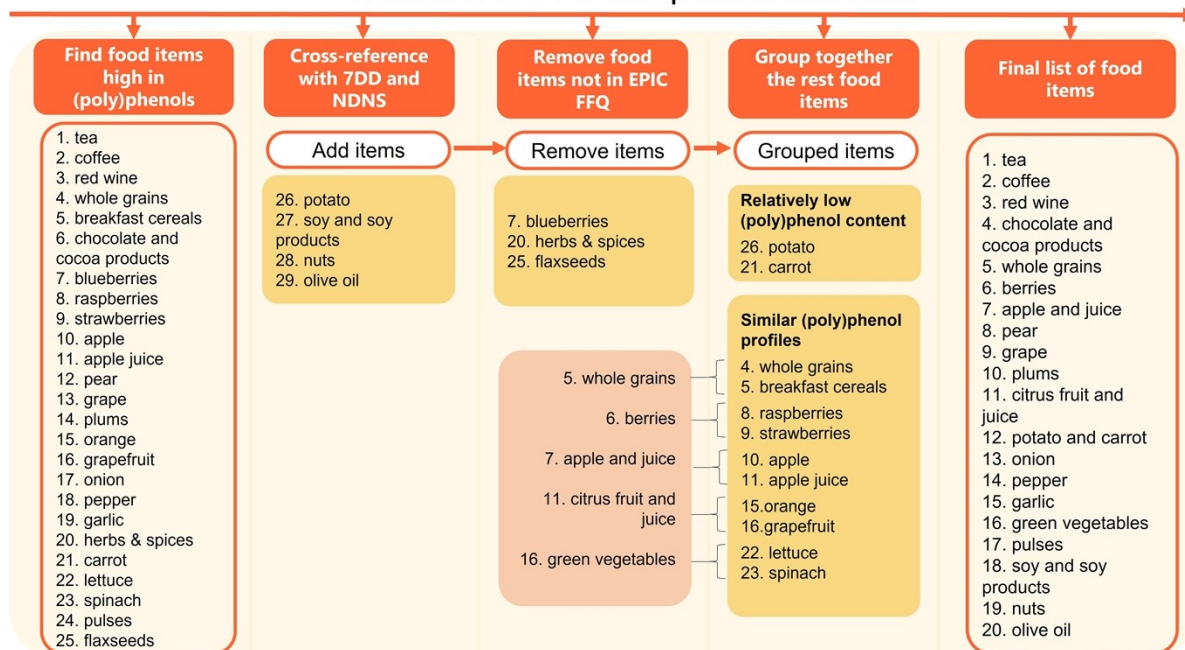

**Figure S1. Workflow of PPS component selection**

7DD, 7-day food diary, EPIC FFQ; European Prospective Investigation into Cancer and Nutrition Food Frequency Questionnaire; NDNS, National Diet and Nutrition Survey; PPS, (Poly)phenol-rich diet score

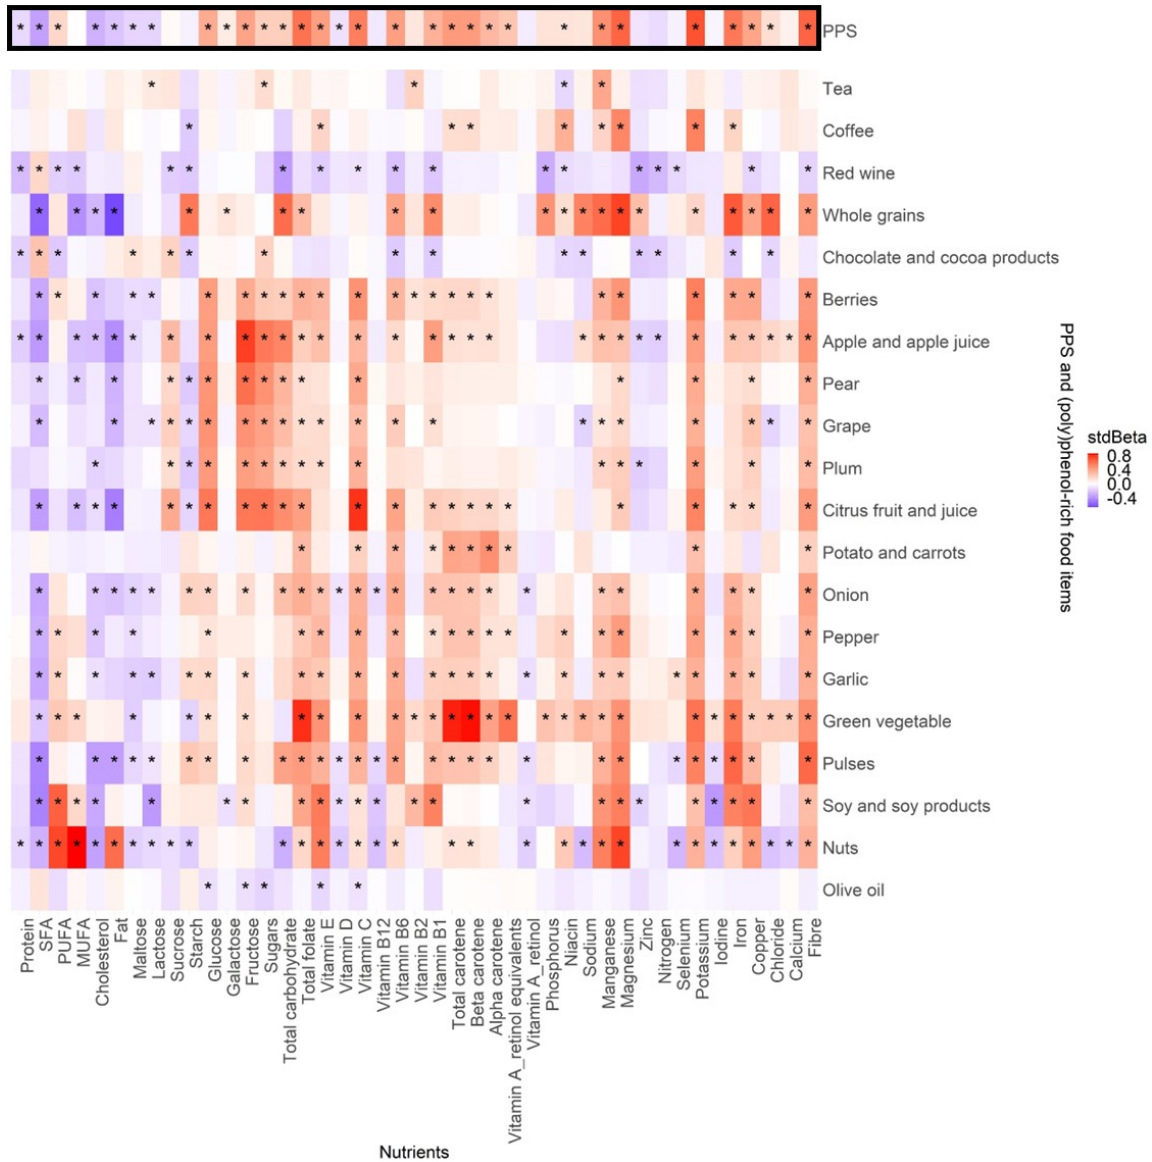

**Figure S2. Association between PPS, (poly)phenol-rich food items and the nutrients intake from FFQs**  
 The heatmap was plotted according to the standardized regression coefficients (stdBeta). The colour scale indicates the effect (stdBeta) of each nutrient intake on PPS or (poly)phenol-rich food items intake. Red and blue illustrate positive and negative effects, and colour intensity represents the degree of effect. The asterisks showed significance (\*: *fdr*-adjusted  $p < 0.05$ ). The associations were adjusted for energy intake and trial effect.
